# Supplementary material
Source: MDPI journal article supplement (https://www.mdpi.com/2674-0311/1/2/13)
Supplement: s1 [file s1]

**Table S1: Knowledge about the MDP guidelines**

|                                                                                                                                                                                                                                                                                                                  | Participants that answered correct |
|------------------------------------------------------------------------------------------------------------------------------------------------------------------------------------------------------------------------------------------------------------------------------------------------------------------|------------------------------------|
| <b>Foods that belong to the starchy food group in the Mediterranean diet</b> ( <i>a list of 10 foods options, a participant is given a score of 1 point if they answered 75% of the options correct</i> )                                                                                                        | 178 (47.7)                         |
| <b>Foods that are high or low in added sugar</b> ( <i>a list of 10 foods, a participant is given a score of 1 point if they answered 75% of the options correct</i> )                                                                                                                                            | 343 (92.0)                         |
| <b>Foods that are considered ultra-processed foods</b> ( <i>a list of 10 foods, a participant is given a score of 1 point if they answered 75% of the answers correct</i> )                                                                                                                                      | 267 (71.6)                         |
| <b>Foods that are high or low in fat</b> ( <i>a list of 14 foods, a participant is given a score of 1 point if they answered 75% of the answers correct</i> )                                                                                                                                                    | 80 (21.4)                          |
| <b>Foods that are considered high in fibre</b> ( <i>a list of 10 foods, a participant is given a score of 1 point if they answered 75% of the answers correct</i> )                                                                                                                                              | 230 (61.7)                         |
| <b>Fatty foods are high in saturated fat</b> ( <i>a list of 10 foods, a participant is given a score of 1 point if they answered 75% of the answers correct</i> )                                                                                                                                                | 19 (5.1)                           |
| <b>Which fat does the Mediterranean diet recommend for people to cut down on?</b> ( <i>Monounsaturated fatty acids, Polyunsaturated fatty acids, Saturated fatty acids and Trans-fatty acids</i> ) a participant is given a score of 1 point if they answered <i>Saturated fatty acids and Trans-fatty acids</i> | 277 (74.3)                         |
| <b>Some foods contain a lot of fat but no cholesterol</b> ( <i>agree, disagree</i> )) a participant is given a score of 1 point if they answered <i>agree</i>                                                                                                                                                    | 214 (57.4)                         |
| <b>How many daily glasses of red wine does the Mediterranean diet recommend?</b> ( <i>__glasses/day</i> )) a participant is given a score of 1 point if they answered <i>1-2glasses per day</i>                                                                                                                  | 64 (17.2)                          |
| <b>Harder fats contain more</b> ( <i>Monounsaturated Fatty Acids Polyunsaturated Fatty Acids, Saturated Fatty Acids</i> )) a participant is given a score of 1 point if they answered <i>saturated fatty acids</i>                                                                                               | 207 (55.5)                         |
| <b>How many servings of fruit and vegetables a day do you think experts are advising people to eat?</b> ( <i>open-ended</i> )                                                                                                                                                                                    | 222 (59.5)                         |
| <b>The largest quantity of saturated fats is found in:</b><br><br>( <i>Vegetable oil, Butter, Olive oil, Dairy products</i> )) a participant is given a score of 1 point if they answered <i>butter</i>                                                                                                          | 214 (57.4)                         |

**Table S2: Knowledge about the MDP food choices**

|  | N (%) answered correctly |
|--|--------------------------|
|--|--------------------------|

|                                                                                                                                                                                                                                                                                            |            |
|--------------------------------------------------------------------------------------------------------------------------------------------------------------------------------------------------------------------------------------------------------------------------------------------|------------|
| <b>Do you think health experts recommend that people should be eating more, the same amount, or less of these foods?</b> <i>(a list of 10 foods, a participant is given a score of 1 point if they answered 75% of the answers correct)</i>                                                | 310 (83.1) |
| <b>Foods that are considered healthy alternatives for red meat as per the Mediterranean diet</b> <i>(a list of 10 foods, a participant is given a score of 1 point if they answered 75% of the answers correct)</i>                                                                        | 297 (79.6) |
| <b>If a person felt like something sweet, which would be the best choice as part of the Mediterranean diet?</b> <i>(Jelly on toast, cereal snack bar, plain biscuit, banana with plain yogurt) a participant is given a score of 1 point if they answered banana with plain yogurt</i>     | 343 (92.0) |
| <b>Which cheeses would be the best choice for the Mediterranean diet?</b> <i>(White cheese, yellow cheese) a participant is given a score of 1 point if they answered white cheese</i>                                                                                                     | 345 (92.5) |
| <b>Which would be the best choice for a snack as part of the Mediterranean?</b> <i>(Chips/ Crisps, hummus with whole-grain crackers, biscuits, muesli bar) a participant is given a score of 1 point if they answered hummus with whole-grain crackers</i>                                 | 344 (92.2) |
| <b>Which would be the best choice for a meal as part of the Mediterranean?</b> <i>(Pasta with red sofrito sauce, chicken breast sandwich, grilled steak with mushroom sauce)) a participant is given a score of 1 point if they answered Pasta with red sofrito sauce</i>                  | 254 (68.1) |
| <b>Which kind of sandwich do you think is healthier?</b> <i>(Two slices of bread with a slice of cheddar cheese filling, two slices of bread with a turkey breast filling) a participant is given a score of 1 point if they answered two slices of bread with a turkey breast filling</i> | 341 (91.4) |
| <b>Which foods is the best choice as part of the Mediterranean diet?</b> <i>(Steak, grilled, Sausages, grilled, Fish, grilled, Pork chop, grilled) a participant is given a score of 1 point if they answered Fish, grilled</i>                                                            | 343 (92.0) |
| <b>Which of these breads contains the most vitamins and minerals and is recommended as part of the Mediterranean diet?</b> <i>(White bread, Brown bread, Whole-grain bread) a participant is given a score of 1 point if they answered whole-grain bread</i>                               | 354 (94.9) |
| <b>What types of dairy foods do experts in the Mediterranean diet say people should eat?</b> <i>(Yogurt, Cheese, Milk, all of the above)) a participant is given a score of 1 point if they answered all of the above</i>                                                                  | 204 (54.7) |
| <b>What is the best choice of fat in the Mediterranean diet?</b> <i>(Butter, Vegetable oil, Canola oil, Olive oil) a participant is given a score of 1 point if they answered olive oil</i>                                                                                                | 335 (89.8) |

**Table S3: Knowledge about the health benefits of the MDP**

|                                                                                                                                                                 | N (%)<br>answered<br>correctly |
|-----------------------------------------------------------------------------------------------------------------------------------------------------------------|--------------------------------|
| <b>Do you think the Mediterranean diet has a beneficial effect against cancer</b> <i>(yes, no)?</i>                                                             | 73 (19.6)                      |
| <b>Do you think the Mediterranean diet has a beneficial effect against heart diseases</b> <i>(yes, no)?</i>                                                     | 151 (40.5)                     |
| <b>Do you think the Mediterranean diet has a beneficial effect against cognitive decline</b> <i>(yes, no)?</i>                                                  | 70 (18.8)                      |
| <b>Do you think the Mediterranean diet has a beneficial effect against diabetes type 2</b> <i>(yes, no)?</i>                                                    | 125 (33.5)                     |
| <b>Do you think the Mediterranean diet has a beneficial effect against obesity</b> <i>(yes, no)?</i>                                                            | 134 (35.9)                     |
| <b>do you think these food sources are rich in antioxidants?</b> <i>(Yes, no)</i>                                                                               | 260 (69.7)                     |
| <b>Which one of these is commonly thought to raise people's blood cholesterol level?</b> <i>(Polyunsaturated fats, Saturated fats, Cholesterol in the diet)</i> | 148 (39.7)                     |
| <b>Olive oil is a healthier fat than butter</b> <i>(yes, no)</i>                                                                                                | 336 (90.1)                     |

**Table S4: Questions related to the perceived importance of following the MDP**

|                                                                               | Not<br>important<br><br>(1 point) | Neutral<br><br>(2 points) | Important n<br>(%)<br><br>(3 points) |
|-------------------------------------------------------------------------------|-----------------------------------|---------------------------|--------------------------------------|
| How important is it to follow the Mediterranean dietary guidelines?           | 38 (10.2)                         | 128 (34.3)                | 207 (55.5)                           |
| How important is it to follow a low red meat diet?                            | 45 (12.1)                         | 95 (25.5)                 | 233 (62.5)                           |
| How important is it to consume fish on regular basis?                         | 45 (12.1)                         | 76 (20.4)                 | 252 (67.6)                           |
| How important is it to eat fruits and vegetables daily?                       | 21 (5.6)                          | 13 (3.5)                  | 339 (90.9)                           |
| How important is it to use olive oil as the major source of fat in your diet? | 48 (12.9)                         | 131 (35.1)                | 194 (52.0)                           |

|                                                                                   |          |           |            |
|-----------------------------------------------------------------------------------|----------|-----------|------------|
| How important is it to consume whole-wheat bread rather than regular white bread? | 27 (7.2) | 50 (13.4) | 296 (79.4) |
| How important is it to consume less sugar and sweetened foods and beverages?      | 20 (5.4) | 15 (4.0)  | 338 (90.6) |

**Table S5: Questions related to the food preferences in the MDP**

|                                                          | Dislike<br>1 point | Neutral<br>2 points | Like n (%)<br>3 points |
|----------------------------------------------------------|--------------------|---------------------|------------------------|
| How much do you like the flavour of fish?                | 61 (16.4)          | 86 (23.1)           | 226 (60.6)             |
| How much do you like the flavor of chicken?              | 56 (15.0)          | 64 (17.1)           | 253 (67.8)             |
| How much do you like the flavour of red meat?            | 86 (23.1)          | 101 (27.1)          | 186 (49.9)             |
| How much do you like the flavour of nuts?                | 44 (11.8)          | 97 (26.1)           | 232 (62.2)             |
| How much do you like the flavour of fruits?              | 36 (9.7)           | 34 (9.1)            | 303 (81.2)             |
| How much do you like the flavour of vegetables?          | 31 (8.3)           | 75 (20.1)           | 267 (71.6)             |
| How much do you like the flavour of dairy products?      | 50 (13.4)          | 86 (23.1)           | 237 (63.5)             |
| How much do you like the flavour of legumes?             | 58 (15.5)          | 137 (36.7)          | 178 (47.7)             |
| How much do you like the flavour of sweetened beverages? | 132 (35.4)         | 119 (31.9)          | 122 (32.7)             |
| How much do you like the flavour of sweets?              | 81 (21.7)          | 109 (29.2)          | 183 (49.1)             |

|                                                            |            |            |            |
|------------------------------------------------------------|------------|------------|------------|
| How much do you like the flavour of olive oil?             | 40 (10.7)  | 133 (35.7) | 200 (53.6) |
| How much do you like the flavour of? whole-grain products? | 46 (12.3)  | 96 (25.8)  | 231 (61.9) |
| How much do you like the flavour of white bread?           | 109 (29.2) | 129 (34.6) | 135 (36.2) |
| How much do you like the flavour of red wine?              | 147 (39.4) | 98 (26.3)  | 128 (34.3) |

**Table S6: Questions related to the perceived barriers to following the MDP**

|                                                                                                                 | Not difficult<br>1 point | Neutral<br>2 points | Difficult n<br>(%)<br>3 points |
|-----------------------------------------------------------------------------------------------------------------|--------------------------|---------------------|--------------------------------|
| How difficult is it for you to follow the general recommendations of the Mediterranean diet?                    | 148 (39.7)               | 155 (41.6)          | 70 (18.8)                      |
| How difficult is it for you to minimise your intake of red meat?                                                | 229 (61.4)               | 92 (24.7)           | 52 (13.9)                      |
| How difficult is it for you to eat at least 2 servings of fish per week?                                        | 156 (41.8)               | 95 (25.5)           | 122 (32.7)                     |
| How difficult is it for you to consume 5 servings of fruits and vegetables per day?                             | 294 (78.8)               | 70 (18.8)           | 9 (2.4)                        |
| How difficult is it for you to consume 1-2 glasses of red wine per day? (If you already consume wine regularly) | 60 (16.1)                | 87 (23.3)           | 226 (60.6)                     |
| How difficult is it for you to consume no more than 2 servings of dairy per day?                                | 199 (53.4)               | 142 (38.1)          | 32 (8.6)                       |
| How difficult is it for you to consume at least 3 servings of legumes per week?                                 | 152 (40.8)               | 149 (39.9)          | 72 (19.3)                      |
| How difficult is it for you to consume whole-grain breads and cereals?                                          | 265 (71.0)               | 92 (24.7)           | 16 (4.3)                       |
| How difficult is it for you to consume no more than 4 eggs per week?                                            | 205 (55.0)               | 110 (29.5)          | 58 (15.5)                      |
| How difficult is it for you to utilize olive oil as the major source of fat in your diet?                       | 202 (54.2)               | 133 (35.7)          | 38 (10.2)                      |

**Table S7: Questions related to self-confidence to following the MDP**

|                                                                                               | Not<br>confident<br><br>1 point | Neutral<br><br>2 points | Confident<br>(%)<br><br>3 points |
|-----------------------------------------------------------------------------------------------|---------------------------------|-------------------------|----------------------------------|
| How confident do you feel in following the general recommendations of the Mediterranean diet? | 47 (12.6)                       | 212 (56.8)              | 114 (30.6)                       |
| How confident do you feel in cooking food at home on most days of the week                    | 38 (10.2)                       | 102 (27.3)              | 233 (62.5)                       |
| How confident do you feel in using olive oil on daily basis?                                  | 45 (12.1)                       | 135 (36.2)              | 193 (51.7)                       |
| How confident do you feel in minimising your intake of sweetened beverages?                   | 29 (7.8)                        | 95 (25.5)               | 249 (66.8)                       |
| How confident do you feel in consuming white meats (fish and chicken) over red meats?         | 43 (11.5)                       | 120 (32.2)              | 210 (56.3)                       |
