# Supplementary material
Source: MDPI journal article supplement (https://www.mdpi.com/2674-0311/1/2/13)
Supplement: s1 [file s1]

Archive with 1 entries (1 files):
- dietetics-1765290-supplementary.pdf
